# Supplementary material
Source: Springer Nature journal article supplement (https://www.springermedizin.de/resource/supplementary/12913_2012_2054_MOESM5_ESM.pdf/9529852)
Supplement: MOESM5 [file 9529852]

## Additional File 5: Main characteristics of included studies –hypertension care in the community in China

| Study code | Year | Sample size | Follow up (year) | Region    | Participants                                            | Age                  | Male (%) | Intervention                                                                                                                                                                                                               | Provider |
|------------|------|-------------|------------------|-----------|---------------------------------------------------------|----------------------|----------|----------------------------------------------------------------------------------------------------------------------------------------------------------------------------------------------------------------------------|----------|
| RCT001     | 1999 | 200         | 0.33             | Sichuan   | Hypertensive outpatients                                | 40-75                | 43%      | Health education: self-help educational booklets; weekly telephone follow up advice; monthly home visit and group sessions; group discussions                                                                              | Doctor   |
| RCT002     | 2000 | 360         | 2                | Guangdong | Pre-hypertension in old people (60 and above years old) | Mean 66, range 60-79 | 56.10%   | CB interventions: health education (weekly counselling, monthly workshops, self-help materials). Advices on exercise, diet, life style changes, psychological health. Weekly home visit and involvement of family members. | Nurse    |
| RCT003     | 2000 | 334         | 3                | Guangdong | Hypertensive old patients in community                  | ≥60                  | 39.20%   | CB comprehensive intervention: patient registry, regular monitoring, services at neighbourhood centres, individual advices, health education (various forms), training community health workers.                           | Nurse    |
| RCT004     | 2001 | 148         | 0.33             | Guangxi   | Hypertensive patients in community                      | 35-75                | 49.30%   | CB intensive health education: self-help booklet, monthly workshop and discussion, with biopsy samples, educational videos. BP knowledge competitions every 3 months.                                                      | Nurse    |
| RCT005     | 2002 | 243         | 3                | Zhejiang  | Hypertensive patients in community                      | Mean 59-63           | 45.30%   | Monthly GP home visits for 3 years and monthly educational workshops: scheduled management of patients with high BP, educational and behavioural interventions                                                             | Doctor   |
| RCT006     | 2002 | 68          | 1.5              | Zhejiang  | Hypertensive patients (not specified)                   | Mean 52.8 (6.3)      | 45.70%   | CB comprehensive nursing care: educational group or individual sessions, self-help educational materials, relaxation exercise, advice on life-style, exercise, and treatment compliance.                                   | Nurse    |
| RCT007     | 2003 | 245         | 0.33             | Hebei     | Hypertensive patients from a factory                    | Mean 63.4 (5.5)      | 46.10%   | Training for self-management: based on self-efficacy theory; group training session led by patient volunteers and supported with professionals; weekly session for 7 weeks.                                                | Unclear  |
| RCT008     | 2004 | 180         | NR               | Guangdong | Hypertensive patients in community                      | Mean 67              | 70.60%   | Educational interventions: workshops or other educational materials. Advice on life-style and behavioural changes, self-management, and risk and treatment of hypertension.                                                | Unclear  |

| Study code | Year | Sample size | Follow up (year) | Region    | Participants                                     | Age                       | Male (%) | Intervention                                                                                                                                                                                                                                                                   | Provider |
|------------|------|-------------|------------------|-----------|--------------------------------------------------|---------------------------|----------|--------------------------------------------------------------------------------------------------------------------------------------------------------------------------------------------------------------------------------------------------------------------------------|----------|
| RCT009     | 2004 | 104         | 0.5              | Shandong  | Hypertensive patients discharged from a hospital | Mean 50 (4), range 47-60  | 55.80%   | Community nursing care: weekly telephone follow up. Advice on family support, self-monitoring, and treatment compliance.                                                                                                                                                       | Nurse    |
| RCT010     | 2004 | 581         | 2                | Guangdong | Hypertensive patients in community               | 61.65 (8.27), range 35-81 | NR       | Community nursing care: monthly home visit for 2 years. Individualised counselling or group sessions; advice on diet, exercise, and psychological health.                                                                                                                      | Doctor   |
| RCT011     | 2004 | 90          | 2                | Beijing   | Hypertensive outpatients                         | 66.5 (4.7), range 60-79   | 100%     | Community nursing care: special nursing team, regular daily community visits, educational workshops, healthcare plan. Advice on diet, low salt, life-styles, and treatment compliance.                                                                                         | Nurse    |
| RCT012     | 2004 | 219         | 0.5              | Shanghai  | Hypertensive patients in community               | 67.2 (9.5), range 35-80   | 51.60%   | CB self-management: 6 weekly health education sessions for self-management, plus individualised support by telephone counselling (by trained community doctors), and involvement of community.                                                                                 | Doctor   |
| RCT013     | 2004 | 400         | 3                | Zhejiang  | Hypertensive patients in community               | 45-82                     | 41.30%   | CB management: health education - booklets, group sessions; face-to-face counselling. Advice on diet, medication, life-styles, psychological health, and treatment medications.                                                                                                | Doctor   |
| RCT014     | 2005 | 247         | 4                | Shanxi    | Hypertensive patients in community               | NR                        | 45%      | CB comprehensive intervention: monthly home visit for 4 years; advice on behavioural, dietary and psychological health.                                                                                                                                                        | Doctor   |
| RCT015     | 2005 | 200         | 2                | Zhejiang  | Hypertensive patients in community               | NR                        | NR       | CB interventions: educational workshops (every three months). Assigned community doctor-patient contacts, monthly BP measurement. Advice on behavioural, psychological health. Individualised pharmacological interventions.                                                   | Doctor   |
| RCT016     | 2005 | 204         | 1                | Guangdong | Hypertensive outpatients                         | Mean 52 (range 34 -80)    | 57.40%   | Community nursing care: two home visits during the first 2 months, then at least 2 telephone contacts; advice on self monitoring, family support, life-styles and treatment compliance.                                                                                        | Nurse    |
| RCT017     | 2005 | 251         | 1                | Anhui     | Hypertensive patients in community               | Mean 58.2 (11.5)          | 57.60%   | Family-centred interventions: interview family members to identify and change life styles; neighbourhood intervention to improve family relations. 1-2 home visits per month, and then every 1-3 months. Advice on diet, exercise, psychological health, treatment compliance. | Doctor   |

| Study code | Year | Sample size | Follow up (year) | Region    | Participants                                     | Age                        | Male (%) | Intervention                                                                                                                                                                                                                | Provider |
|------------|------|-------------|------------------|-----------|--------------------------------------------------|----------------------------|----------|-----------------------------------------------------------------------------------------------------------------------------------------------------------------------------------------------------------------------------|----------|
| RCT018     | 2005 | 376         | 0.5              | Guangdong | Old hypertensive patients in community           | Old patients (age unclear) | 53.20%   | Health education: educational workshop every two weeks for 6 months, involving patients and family members. Advice on life style, diet, and knowledge on HBP complications and treatment compliance.                        | Nurse    |
| RCT019     | 2006 | 1000        | 1                | Jiangsu   | Hypertensive patients from community             | >35                        | 60%      | Systematic management of hypertensive patients, according to schedule use of anti-hypertensives (NAH scheme). Monthly monitoring follow-up. Regular health education workshops.                                             | Doctor   |
| RCT020     | 2006 | 40          | 0.5              | Shanghai  | Hypertensive outpatients in a community hospital | 55-65                      | 55%      | Regular monitoring follow-up (2-4 outpatient visits per month, plus monthly home visit). Advice on life-style, behavioural and dietary changes, and treatment compliance.                                                   | Doctor   |
| RCT021     | 2006 | 100         | 0.083            | Anhui     | Hypertensive patients in community               | 48-78                      | 44%      | CB health education: self-help booklet, weekly monitoring for 4 weeks, 2 educational workshops. Advice on hypertension risk, and treatment compliance.                                                                      | Nurse    |
| RCT022     | 2006 | 108         | 2                | Jiangsu   | Hypertensive patients in community               | Mean 65.3                  | 55.60%   | CB treatment compliance intervention: face-to-face counselling during outpatient visit, intensive and frequent advices on treatment compliance and life-style changes.                                                      | Doctor   |
| RCT023     | 2006 | 90          | 3                | Guangdong | Hypertensive patients in community               | Mean 68 (8.6)              | 70%      | Community nursing care: patient registry, health education -regular community workshops. Advice on diet, exercise, psychological health and relaxation.                                                                     | Nurse    |
| RCT024     | 2006 | 137         | 1                | Beijing   | Hypertensive patients in community               | NR                         | 48.90%   | Health education: 3 formal counselling sessions; individualised health education advice on hypertension knowledge, diet, exercise.                                                                                          | Doctor   |
| RCT025     | 2007 | 206         | NR               | Hebei     | Hypertensive patients in community               | NR                         | NR       | CB interventions: Regular follow up visits (home or telephone contacts). Individually assigned community doctors to patients. Advice on life-style and behavioural changes, psychological health, and treatment compliance. | Doctor   |
| RCT026     | 2007 | 220         | 1                | Jiangsu   | Hypertensive patients in community               | Mean 49                    | 53.20%   | CB multiple modes health education, self-help booklets, face-to-face, family members involved. Advice on risk of hypertension, life-style and behavioural health, diet and treatment compliance.                            | Doctor   |
| RCT027     | 2007 | 87          | 1                | Sichuan   | Hypertensive patients - outpatients              | Mean 55.2 (15.6)           | 56.30%   | CB - outpatient visits, telephone or home visit follow up, health education workshops, individualized advice on treatment compliance.                                                                                       | Doctor   |

| Study code | Year | Sample size | Follow up (year) | Region           | Participants                                     | Age                          | Male (%) | Intervention                                                                                                                                                                                                                             | Provider             |
|------------|------|-------------|------------------|------------------|--------------------------------------------------|------------------------------|----------|------------------------------------------------------------------------------------------------------------------------------------------------------------------------------------------------------------------------------------------|----------------------|
| RCT028     | 2007 | 120         | 0.5              | Hunan            | Hypertensive patients in community               | 41-82                        | 65%      | Community nursing, weekly telephone follow up, monthly home visit. Advice on life-style, behaviours, diet, psychological health, family support, and treatment compliance.                                                               | Nurse                |
| RCT029     | 2007 | 56          | NR               | Zhejiang         | Hypertensive patients - outpatients              | Mean 66.8 (3.6), 60-78       | 57.10%   | Community nursing, weekly home visit. Advice on family support, self-management, and treatment compliance.                                                                                                                               | Nurse                |
| RCT030     | 2007 | 120         | 0.5              | Hunan            | Hypertensive patients discharged from a hospital | Mean 51.8 (5.3); range 45-59 | 61.70%   | Community nursing: advice/material on self-management; frequent telephone/home visit follow up (weekly for one month and then monthly for 5 months). Advice on self-management, life-styles, diet, and treatment compliance.             | Nurse                |
| RCT031     | 2007 | 120         | 0.5              | Hubei            | Hypertensive patients discharged from a hospital | 38-73                        | 50.80%   | Community health education: 2 group sessions per month, individual counselling of selected patients; plus telephone contacts. Advice on psychological health, life-style, diet, exercise, self BP measurement, and treatment compliance. | Both: Nurse & Doctor |
| RCT032     | 2007 | 200         | NR               | Hubei            | Hypertensive patients in community               | Mean 63.8 (2.5)              | 60%      | Health education +family-based interventions: training family members on knowledge of hypertension, life styles and behaviours, and psychological health. Weekly free BP measurement, and appropriate adjustment of medications.         | Nurse                |
| RCT033     | 2007 | 300         | 1                | Zhejiang (Rural) | Hypertensive patients in community               | ≥ 60                         | 43%      | Health education: every 2 month face-to-face advices; home visit or telephone contact. Advice on hypertension knowledge, life-style, diet, exercise, psychological health, regular BP monitoring, treatment compliance.                  | Unclear              |
| RCT034     | 2007 | 76          | 0.5              | Shandong         | Hypertensive patients in community (>60)         | 60 -74                       | 53.80%   | Community nursing care: including community health workers, neighbourhood staff and family members. Health education, advice on diet, exercise, psychological relaxing training, frequent BP monitoring.                                 | Nurse                |
| RCT035     | 2007 | 280         | 1                | Zhejiang         | Hypertensive outpatients in a community hospital | NR                           | NR       | Community nursing care: various health educational activities (self-help materials, group sessions and patient led discussions). Advice on psychological health, life styles, and treatment compliance.                                  | Nurse                |

| Study code | Year | Sample size | Follow up (year) | Region           | Participants                                     | Age                          | Male (%) | Intervention                                                                                                                                                                                                                                                                               | Provider             |
|------------|------|-------------|------------------|------------------|--------------------------------------------------|------------------------------|----------|--------------------------------------------------------------------------------------------------------------------------------------------------------------------------------------------------------------------------------------------------------------------------------------------|----------------------|
| RCT036     | 2008 | 272         | 1                | Shandong         | Hypertensive patients in community               | 60-86                        | 61.80%   | IKAP nursing model (information, knowledge, attitude, practice): deciding targets according to patient baseline data; providing community nursing care (twice per month for 12 months); advice on life-style changes, self-management, family support, and treatment compliance.           | Nurse                |
| RCT037     | 2008 | 888         | 3                | Guangdong        | Hypertensive patients in community               | Mean 62 (6.4); 35 - 75       | 40.50%   | CB health promotion: workshops and other health educational activities; monthly free BP measurement at community centres or at home. Individualised management of hypertensive patients. Advice on life-style changes, and treatment compliance.                                           | Doctor               |
| RCT038     | 2008 | 240         | 0.5              | Sichuan          | Hypertensive patients discharged from a hospital | Mean 67.8 (4.0), range 58-81 | 51.70%   | Community nursing care: 2 home visit or telephone contacts during the first month, self-help educational information, Individualised advice on risk, prevention and treatment of hypertension, psychological health, life-style, diet, exercise, family support, and treatment compliance. | Nurse                |
| RCT039     | 2008 | 354         | 0.94             | Shanghai         | Hypertensive patients in community               | Mean 68.5 (12.9)             | NR       | CB health education: Monthly educational workshops, self-help booklets, monthly telephone or outpatient follow up. Advice on psychological health, life-style, and treatment compliance.                                                                                                   | Doctor               |
| RCT040     | 2008 | 185         | 0.25             | Guangxi          | Hypertensive patients in community               | NR                           | NR       | Self-management: three monthly training sessions for self-management; self-help booklet; health professionals' support/advice.                                                                                                                                                             | Nurse                |
| RCT041     | 2008 | 417         | NR               | Zhejiang (Rural) | Hypertensive patients in community               | NR                           | 53.20%   | CB intensive health education: monthly group sessions, self-help materials, home visits. Advice on life-styles, psychological health, exercise, low salt, treatment compliance.                                                                                                            | Doctor               |
| RCT042     | 2008 | 150         | 3                | Guangdong        | Hypertensive inpatients discharged from hospital | Mean 66.03 (7.4)             | 38.70%   | CB comprehensive intervention: 1-2 group educational sessions per month, self-help educational materials, regular follow up and monitoring; advices on life style, diet, psychological health, and treatment compliance.                                                                   | Doctor               |
| RCT043     | 2008 | 300         | 1                | Shanghai         | Patients with uncontrolled hypertension          | 31-88                        | 60%      | CB primary care intervention: stable relation between doctor and patient; weekly clinic or home visit (or monthly after adequate BP control). Advices on life style, diet, health behaviours, risk of hypertension, and treatment compliance.                                              | Both: Nurse & Doctor |

| Study code | Year | Sample size | Follow up (year) | Region    | Participants                                     | Age                       | Male (%) | Intervention                                                                                                                                                                                                                                                                           | Provider |
|------------|------|-------------|------------------|-----------|--------------------------------------------------|---------------------------|----------|----------------------------------------------------------------------------------------------------------------------------------------------------------------------------------------------------------------------------------------------------------------------------------------|----------|
| RCT044     | 2008 | 130         | 1                | Shanghai  | Hypertensive patients in community               | 50-80                     | NR       | Community nursing: development of a nursing care team; group education sessions (every 3 months); individual face-to-face counselling, regular home or telephone visits; care records, self-help handbooks, family support. Advice on risk factors, medication, diet, physical health. | Nurse    |
| RCT045     | 2008 | 386         | 3                | Henan     | Hypertensive patients from various sources       | Mean 45 (16), range 17-78 | 49.70%   | CB comprehensive intervention: health education (various forms) - workshops every 3 months. Patient and family registry; family support, telephone or home visit.                                                                                                                      | Doctor   |
| RCT046     | 2008 | 120         | 1                | Anhui     | Hypertensive patients in community               | Mean 62.8                 | 55.80%   | Community nursing: risk assessment, action plan agreed between community nurse and patient; implementation of interventions (dietary, physical activities, mental health, compliance to treatment); and evaluations                                                                    | Nurse    |
| RCT047     | 2008 | 200         | 0.5              | Guangdong | Hypertensive outpatients                         | 32-82                     | 62%      | Health education: self-help educational materials; workshops and discussion; monthly telephone follow up and advice on treatment compliance.                                                                                                                                           | Nurse    |
| RCT048     | 2008 | 106         | 1                | Guangxi   | Hypertensive patients in community               | Mean 50                   | 52.80%   | Family centred interventions: Community nurse home visit intervention for 6 months; family health assessment, health education to family members; behaviour changes plan at home; support from family members.                                                                         | Nurse    |
| RCT049     | 2009 | 402         | 0.7              | Shanghai  | Hypertensive patients in community               | NR                        | NR       | Health education: 4 workshops in 2 months, advice on BP measurement, risk of hypertension and treatment compliance.                                                                                                                                                                    | Doctor   |
| RCT050     | 2009 | 176         | 0.5              | Hunan     | Hypertensive patients                            | 45.5 (30-55)              | NR       | Health education: individualized, specific and problem orientated. Advice on the risk of hypertension, life-style changes, psychological health, and treatment compliance.                                                                                                             | Nurse    |
| RCT051     | 2009 | 786         | 1                | Jiangsu   | Hypertensive patients in community               | ≥ 35                      | NR       | Health education: regular advice on the prevention and treatment of high blood pressure to patients in the intervention group (not further details).                                                                                                                                   | Unclear  |
| RCT052     | 2009 | 148         | 1                | Jilin     | Hypertensive outpatients in a community hospital | 62 (5), range 35-88       | 64.90%   | Health education: advice on life-style, behavioural and dietary changes, and treatment compliance                                                                                                                                                                                      | Nurse    |

| Study code | Year | Sample size | Follow up (year) | Region    | Participants                                                            | Age                                   | Male (%) | Intervention                                                                                                                                                                                                                         | Provider             |
|------------|------|-------------|------------------|-----------|-------------------------------------------------------------------------|---------------------------------------|----------|--------------------------------------------------------------------------------------------------------------------------------------------------------------------------------------------------------------------------------------|----------------------|
| RCT053     | 2009 | 306         | 3                | Guangxi   | Hypertensive patients among community residents (mainly civil servants) | Mean 56.17 (7.93)                     | 52.20%   | Intensive health education: Educational workshops, educational booklets. Training of community health workers. Regular follow up monitoring (community, home or telephone). Advice on life-style and behavioural changes.            | Doctor               |
| RCT054     | 2009 | 106         | 0.5              | Guangxi   | Hypertensive patients in community                                      | 58.5 (42 -74)                         | 56.60%   | CB health education: advice on life-style and behavioural changes, diet, psychological health, and treatment compliance.                                                                                                             | Unclear              |
| RCT055     | 2009 | 60          | 1                | Anhui     | Hypertensive patients in community                                      | 60-80                                 | 50%      | Community nursing care: regular educational workshops, self-help educational materials, individualised counselling. Advice on life-style, diet, psychological health, exercises, and treatment compliance.                           | Nurse                |
| RCT056     | 2009 | 64          | 1                | Hubei     | Hypertensive patients in community                                      | 65.3 (35-78)                          | 54.70%   | Community nursing care: weekly home visit, regular workshops, self-help educational material. Advice on risk of hypertension, treatment compliance, life-style, diet, self-measurement, and treatment compliance.                    | Nurse                |
| RCT057     | 2009 | 700         | 2                | Guangdong | Hypertensive patients in community                                      | Mean 67.3/66.2 (9.4/8.7); range 50-80 | 30%      | Community nursing care: advice on self-management, diet, exercise, psychological health, and treatment compliance.                                                                                                                   | Nurse                |
| RCT058     | 2009 | 122         | 1                | Guangxi   | Hypertensive patients in community                                      | Mean 65.7 (9.9)                       | 51.60%   | Community nursing care: home visit twice per month, regular telephone contacts, and outpatient visit arrangement. Advice on risk of hypertension, self-management, life-style, diet, psychological health, and treatment compliance. | Both: Nurse & Doctor |
| RCT059     | 2009 | 640         | 1.5              | Guangdong | Hypertensive patients in community                                      | 33-89                                 | 44.80%   | Community health education: telephone/home visit, workshops, multi-media VCD. Advice on life-style, behaviours, diet, exercise, psychological health, self-BP measurement, and treatment compliance.                                 | Nurse                |
| RCT060     | 2009 | 990         | 1                | Zhejiang  | Hypertensive patients identified by community screening                 | NR                                    | NR       | CB health education: regular (but no more details) advice on High BP knowledge, life style, diet, and treatment of hypertension.                                                                                                     | Nurse                |
| RCT061     | 2009 | 76          | 0.5              | Tianjin   | Hypertensive patients in community                                      | 55.6 (35-78)                          | 55.30%   | CB health education (lack of details): advice on diet, low salt, exercise, psychological health, regular self-monitoring, appropriate anti-hypertensive medication.                                                                  | Unclear              |

| Study code | Year | Sample size | Follow up (year) | Region            | Participants                                  | Age                            | Male (%) | Intervention                                                                                                                                                                                                                                                                                                            | Provider             |
|------------|------|-------------|------------------|-------------------|-----------------------------------------------|--------------------------------|----------|-------------------------------------------------------------------------------------------------------------------------------------------------------------------------------------------------------------------------------------------------------------------------------------------------------------------------|----------------------|
| RCT062     | 2009 | 200         | NR               | Guangdong (Rural) | Hypertensive patients in community            | 66.05 (7.35)                   | 45%      | CB Health education: regular group or individual sessions; home visit or telephone follow up, advice on psychological health, diet, exercise, and hypertension treatment.                                                                                                                                               | Unclear              |
| RCT063     | 2009 | 110         | 1                | Fujian            | Young hypertensive patients in community      | Mean 29.4 (3.4), range 23-35   | 65.50%   | CB comprehensive management: patient registry, risk assessment based hypertension management, regular follow up (telephone or home visits -weekly or monthly or every 3 months), educational workshops, weekly free BP measurement. Advice on life style, diet, psychological health, and anti-hypertensive medication. | Unclear              |
| RCT064     | 2009 | 100         | 1                | Liaoning          | Hypertensive patients in community            | NR                             | NR       | CB interventions: patient registry, educational workshops, advice on life style, diet, low salt, psychological health, BP measurement, treatment compliance.                                                                                                                                                            | Unclear              |
| RCT065     | 2009 | 200         | NR               | Guangdong         | Hypertensive patients (unclear source)        | Mean 54.2 (11.3)               | 60%      | Community nursing: BP measurement every two weeks by the assigned nurses.                                                                                                                                                                                                                                               | Nurse                |
| RCT066     | 2009 | 369         | 0.5              | Shanghai          | Hypertensive patients in community            | Mean 70.01 (9.76), range 35-80 | 36.30%   | CB intervention: 7 workshops (every 2 weeks in 3 months; including discussion and individual advices). Advice based on Chinese Guidelines on hypertension management.                                                                                                                                                   | Both: Nurse & Doctor |
| RCT067     | 2009 | 366         | 0.25             | Sichuan           | Newly diagnosed hypertension outpatients      | 18-75                          | 52.50%   | Health education: individual face-to-face counselling, self-help materials, weekly telephone follow up, outpatient visit every two weeks                                                                                                                                                                                | Unclear              |
| RCT068     | 2009 | 120         | 0.5              | Guangdong         | Hypertensive patients in a research institute | Mean 54 (11), range 50-81      | 60.80%   | Family-centred health education: Involving both patients and families. Monthly group session, self-help materials; advice on regular BP monitoring, life-styles, hypertension risk and management.                                                                                                                      | Unclear              |
| RCT069     | 2009 | 120         | NR               | Jiangxi           | Hypertensive patients in community            | 48-82                          | 61.70%   | Community nursing care: patient registry, regular telephone contacts, educational workshops, self-help materials. Advices on life styles, regular monitoring, diet, psychological health, and treatment compliance.                                                                                                     | Nurse                |
| RCT070     | 2009 | 130         | 1                | Guangdong         | Old hypertensive patients in community        | Mean 63.0 (6.0)                | 55.40%   | Health education: group sessions (every 2 months), self-help booklets, individual advices on medications, diet, physical activities, psychological health, life styles.                                                                                                                                                 | Unclear              |



| Study code | Year | Sample size | Follow up (year) | Region    | Participants                                     | Age                  | Male (%) | Intervention                                                                                                                                                                                                                                                          | Provider |
|------------|------|-------------|------------------|-----------|--------------------------------------------------|----------------------|----------|-----------------------------------------------------------------------------------------------------------------------------------------------------------------------------------------------------------------------------------------------------------------------|----------|
| RCT071     | 2009 | 80          | 0.5              | Jiangsu   | Old hypertensive patients in community           | 60-74                | 54%      | Community nursing: health education (group sessions, advices, discussions, self-help booklets). Advice on psychological health, diet, exercise, family support, and treatment compliance.                                                                             | Nurse    |
| RCT072     | 2009 | 220         | NR               | Hunan     | Hypertensive patients in community               | 61-93                | 55.50%   | Community nursing: health education (group sessions, individual counselling, discussions, self-help booklets). Advice on psychological health, diet, exercise and medications.                                                                                        | Nurse    |
| RCT073     | 2009 | 80          | 0.5              | Shangdong | Newly diagnosed hypertension outpatients         | 30-60                | 82.50%   | Nursing interventions: weekly BP follow up measurement; advice on behaviour changes and treatment compliance.                                                                                                                                                         | Nurse    |
| RCT074     | 2009 | 120         | 0.5              | Sichuan   | Hypertensive patients in community               | 40-80                | 55.80%   | Health education: community nurses providing individualised health educations, weekly home visits, telephone contacts, and workshops.                                                                                                                                 | Nurse    |
| RCT075     | 2010 | 1209        | 1                | Unclear   | Newly diagnosed hypertension outpatients         | Mean 54 (8.5); 30-70 | 47%      | Training of community doctors to follow WHO protocol for CVD risk management using hypertension as an entry point in primary care. Training workshops, followed by training session 2-4 months later to reinforce the intervention.                                   | Doctor   |
| RCT076     | 2010 | 186         | 2                | Jiangxi   | Hypertensive patients                            | Mean 58/60           | 55.90%   | CB managing hypertensive patients: Educational workshops, advice on life-style and behavioural changes, psychological health, and treatment compliance.                                                                                                               | Doctor   |
| RCT077     | 2010 | 600         | 1                | Guangdong | Hypertensive patients                            | Mean 56 (34-82)      | 56%      | Educational workshops (once/2 weeks for 14 weeks) for self-management, life-style changes, psychological health, and treatment compliance.                                                                                                                            | Doctor   |
| RCT078     | 2010 | 402         | 1                | Hubei     | Hypertensive patients                            | >35; mean 49 (6.8)   | NR       | CB management of hypertensive patients: Educational community workshops (2/month), weekly walk-in counselling, home visits or telephone contacts, educational booklets. Advice on risks of hypertension, life-style and behavioural changes, and treatment compliance | Doctor   |
| RCT079     | 2010 | 198         | 0.5              | Guangdong | Hypertensive patients discharged from a hospital | 60-80                | 59.60%   | Community-nursing care: education, monitoring follow-up monthly for 6 months, facilitate patient self-management                                                                                                                                                      | Nurse    |

| Study code | Year | Sample size | Follow up (year) | Region   | Participants                                     | Age                          | Male (%) | Intervention                                                                                                                                                                                                                      | Provider |
|------------|------|-------------|------------------|----------|--------------------------------------------------|------------------------------|----------|-----------------------------------------------------------------------------------------------------------------------------------------------------------------------------------------------------------------------------------|----------|
| RCT080     | 2010 | 160         | 0.83             | Hunan    | Hypertensive patients discharged from a hospital | 45-88                        | 59.30%   | Community-nursing: health education, regular monitoring follow-up for 10 months. Support patient self-management, provide individualised advice.                                                                                  | Nurse    |
| RCT081     | 2010 | 240         | 3                | Hebei    | Hypertensive patients in a research institute    | Mean 55.4 (3.6); range 41-70 | 79.60%   | Regular monitoring follow-up, weekly BP measurement, educational workshops (monthly). Advice on psychological health, life-style changes, family support, and treatment compliance.                                               | Doctor   |
| RCT082     | 2010 | 78          | 0.5              | Hunan    | Hypertensive patients discharged from a hospital | 32-65                        | 59.00%   | Community nursing care: monthly home visit for 6 months; advice on life style, diet, self-monitoring, family support, and treatment compliance.                                                                                   | Nurse    |
| RCT083     | 2010 | 100         | 0.5              | Guangdon | Hypertensive patients in community               | 38-79                        | 54.00%   | Community nursing care: establishing patient record system, frequent telephone/home visit follow up; health education: advice on psychological, behavioural and nutritional health, and treatment compliance.                     | Nurse    |
| RCT084     | 2010 | 100         | 0.5              | Guangxi  | Hypertensive outpatients                         | 43-75                        | 62%      | Community nursing care: health education, advice on high BP knowledge, life styles, diet, low salt intake, exercise, psychological health, self monitoring, and treatment compliance.                                             | Nurse    |
| RCT085     | 2010 | 168         | 0.5              | Zhejiang | Hypertensive outpatients                         | Mean 65.5 (7.9), range 45-88 | 54.80%   | CB comprehensive intervention: treatment plan agreed by both patient and doctor; fortnight home visit; life style changes, and advice on diet, low salt intake, and psychological health                                          | Doctor   |
| RCT086     | 2010 | 152         | 1                | Sichuan  | Hypertensive patients in community               | 63.9 (36 - 82)               | 58.60%   | Community educational & behavioural interventions: before monthly BP measurement, providing face-to-face advice (15 min) on diet, life-style, mental health, exercise, family support, self-monitoring, and treatment compliance. | Doctor   |
| RCT087     | 2010 | 413         | 0.5              | Shanghai | Hypertensive patients in community               | 55.6 (14.7), 35-75           | 51.10%   | CB Self-management: 6 weekly training sessions for self-management; plus self-help booklet, and individualised support/advice.                                                                                                    | Doctor   |
| RCT088     | 2010 | 214         | 2                | Hubei    | Hypertensive patients in community               | Mean 62.7                    | 50.90%   | CB interventions: education workshops (every 3 months), self-help booklets. Advice on life style, exercise, psychological health, and treatment compliance.                                                                       | Unclear  |

| Study code | Year | Sample size | Follow up (year) | Region    | Participants                                     | Age          | Male (%) | Intervention                                                                                                                                                                                                                                             | Provider             |
|------------|------|-------------|------------------|-----------|--------------------------------------------------|--------------|----------|----------------------------------------------------------------------------------------------------------------------------------------------------------------------------------------------------------------------------------------------------------|----------------------|
| RCT089     | 2010 | 80          | 0.33             | Hunan     | Hypertensive outpatients                         | NR           | NR       | Family-centred, professional supported interventions: frequent home and telephone contacts (every 1-3 weeks), involving family members, individualised advice on diet, exercise and life style changes, family support, self-management.                 | Both: Nurse & Doctor |
| RCT090     | 2010 | 186         | 0.25             | Guangdong | Hypertensive patients discharged from a hospital | 45-84        | 53.80%   | Community nursing intervention: patient registry, telephone follow up and advices on health life styles, regular monitoring.                                                                                                                             | Nurse                |
| RCT091     | 2010 | 510         | 5                | Henan     | Hypertensive patients in community               | NR           | 52.40%   | CB comprehensive management: patient registry. Monthly educational workshops, self-help booklets, home visit. Advice on life style changes, exercise, diet, psychological health, and treatment compliance.                                              | Doctor               |
| RCT092     | 2005 | 824         | 0.5              | Hunan     | Hypertensive patients in community               | 58 (35 - 89) | 65.80%   | CB health education: individual counselling, education posters, self-help materials. Advice on life-style, diet, exercise, psychological health, self-monitoring, family support, and treatment compliance.                                              | Unclear              |
| RCT093     | 2007 | 156         | 0.5              | Henan     | Hypertensive outpatients                         | 35 -72       | 55.80%   | Health education: individual counselling, advice on life style changes, diet, low salt intake, exercise, psyhological health, family support, and treatment compliance.                                                                                  | Unclear              |
| RCT094     | 2008 | 442         | 0.5              | Sichuan   | Hypertensive patients in community               | 54 (32 - 86) | 63.80%   | CB interventions: identify patient information need, design educational targets. Home visit, and individual counselling (10-20 minutes) until the target achieved. Advice on life style, diet, exercise, psychological health, and treatment compliance. | Doctor               |
